# Supplementary material for: A Single-Nucleotide Polymorphism of Human Neuropeptide S Gene Originated from Europe Shows Decreased Bioactivity
Source: PLOS journal article supplement (doi:10.1371/journal.pone.0083009), 2013-12-27

Fig. S1

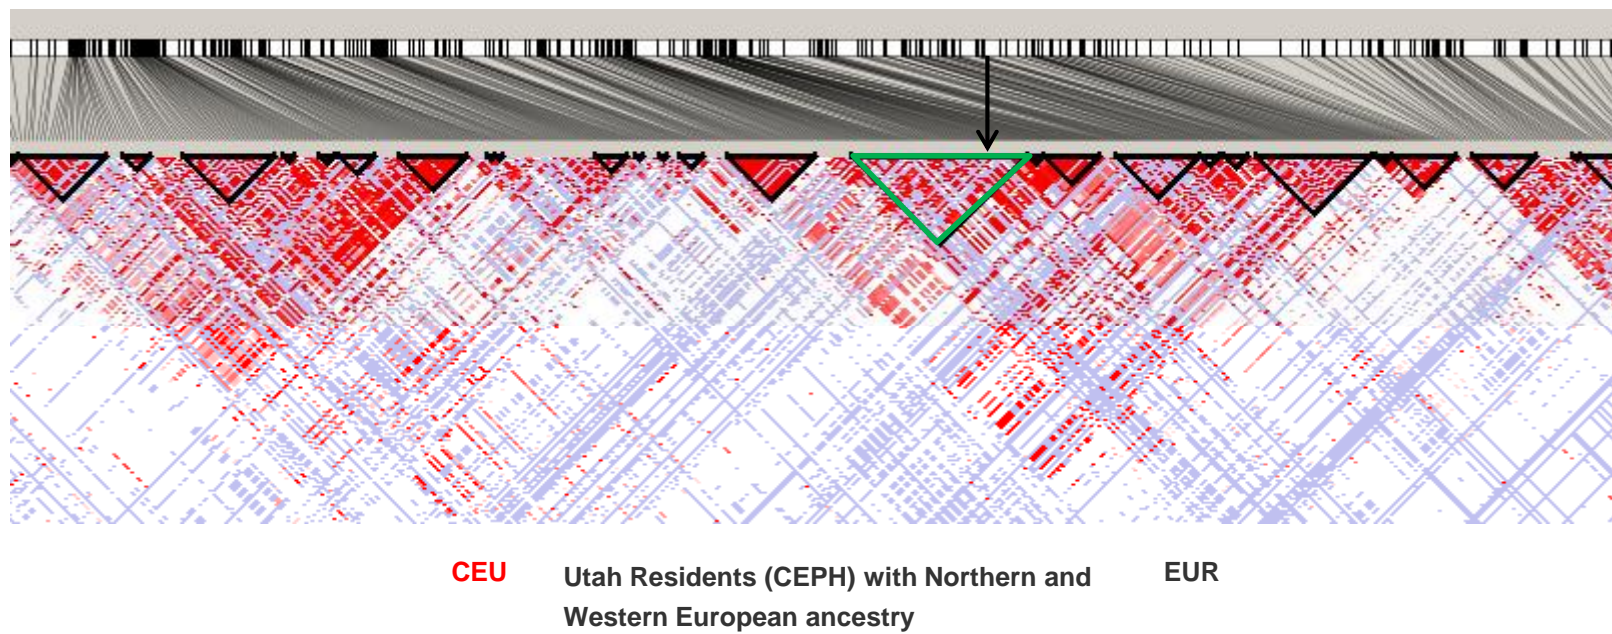

Supplement: S1 (10.1371/journal.pone.0083009.s001) [file journal.pone.0083009.s001]
